# Supplementary material
Source: publisher site journal article supplement (https://www.dovepress.com/article/317462)
Supplement: Supplementary file 1 [file get_supplementary_file.php]

**Supplementary Material**

This file includes:

1. Standard curve of TCPP and Iso (Figure S1)
2. UV-Vis spectrum and (b) FT-IR spectrum of combined NPs (Figure S2)
3. Particle size (*Rh*) and size distribution (PDI) of nanoparticle at10th day and 14th day (Table S1)
4. Temperature evolution of TCPP-NPs (Figure S3)

**Figure S1**

**
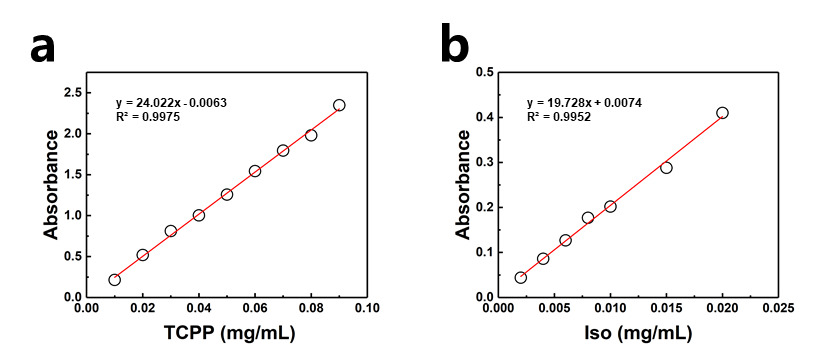
**

**Figure S1.** (a) Standard curve of TCPP; (b) standard curve of Iso.

**Figure S2**

**
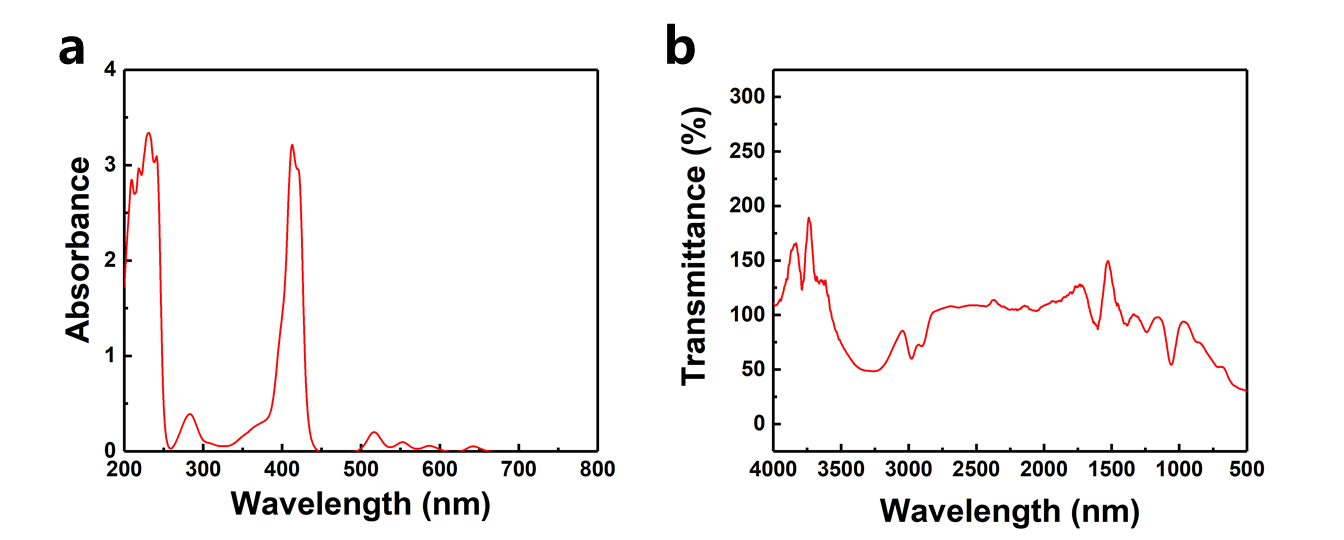
**

**Figure S2.** (a) UV-Vis spectrum and (b) FT-IR spectrum of combined NPs.

**Table S1. Average *Rh* (hydrodynamic radius) and PDIof NPs at 10th day and 14th day**

|  | **NPs at 10th day** | | **NPs at 14th day** |  |
| --- | --- | --- | --- | --- |
|  | ***Rh***  **nm** | **PDI** | ***Rh***  **nm** | **PDI** |
| **NP** | 92.02 | 0.24 | 91.83 | 0.24 |

**Figure S3**

**
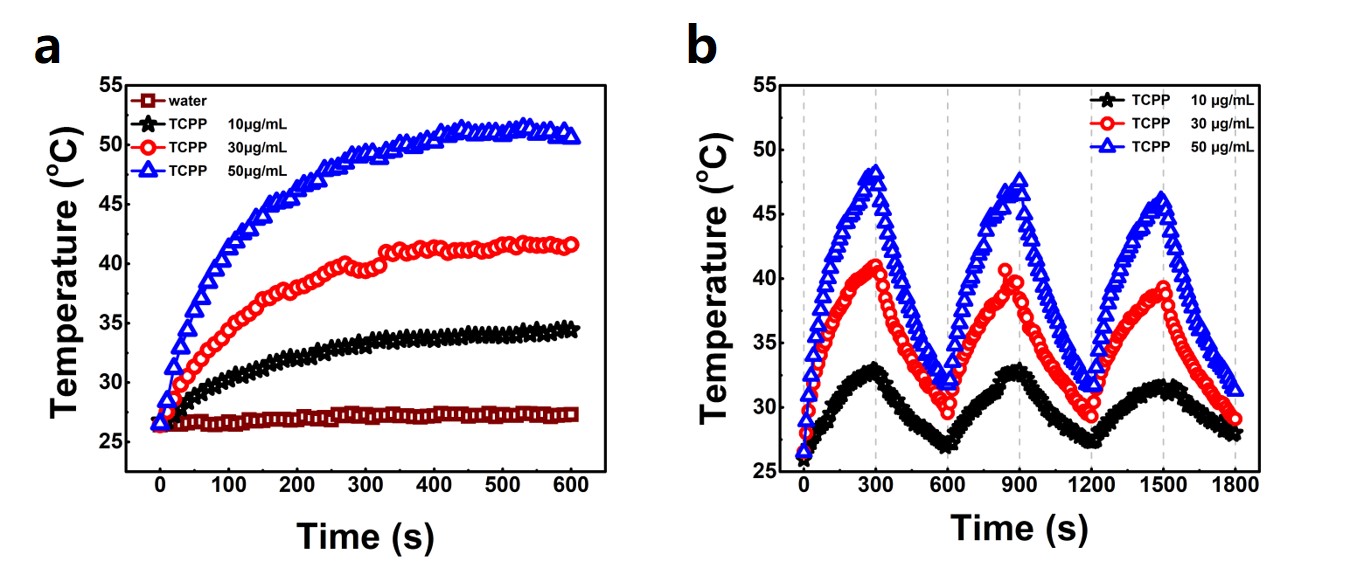
**

**Figure S3.** (a) Temperature evolution of TCPP-NPs solution under 650 nm laser irradiation (6.5 W·cm-2) at different TCPP concentrations; (b) Temperature evolution of TCPP-NPs solution with 3 cycles of laser on/off under 650 nm laser irradiation (6.5 W·cm-2) at different TCPP concentrations.
